# Supplementary material for: Identification of novel dipeptidyl peptidase IV and α-glucosidase inhibitory peptides from Tenebrio molitor
Source: Royal Society of Chemistry journal article supplement (doi:10.1039/d0fo02696d), 2020-12-30

## Supplementary material

### Mass spectra of peptides:

#### PAALST

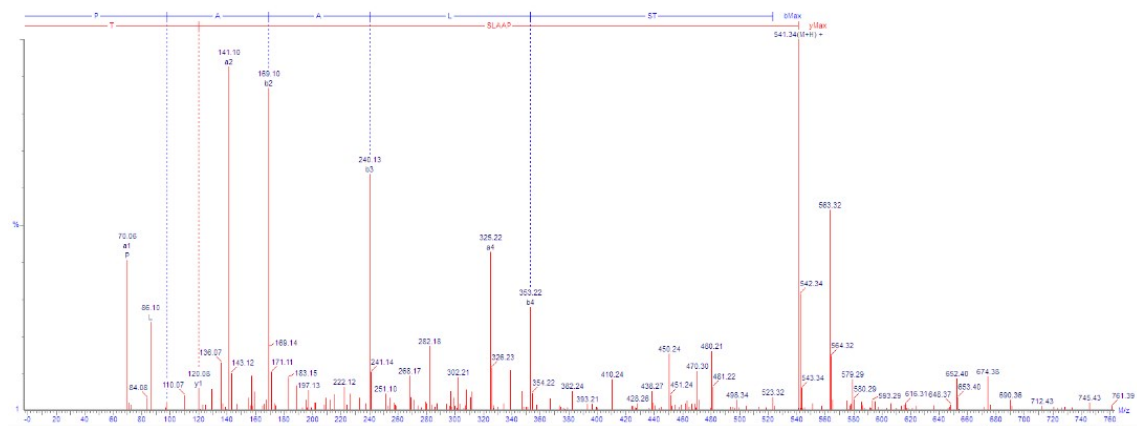

#### SLAPK

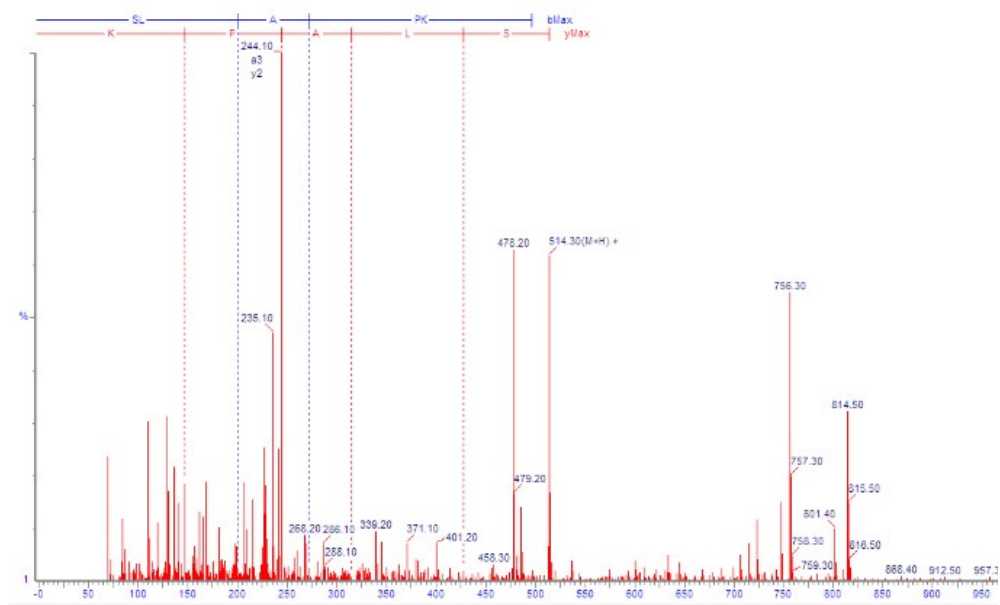

#### VHCSE

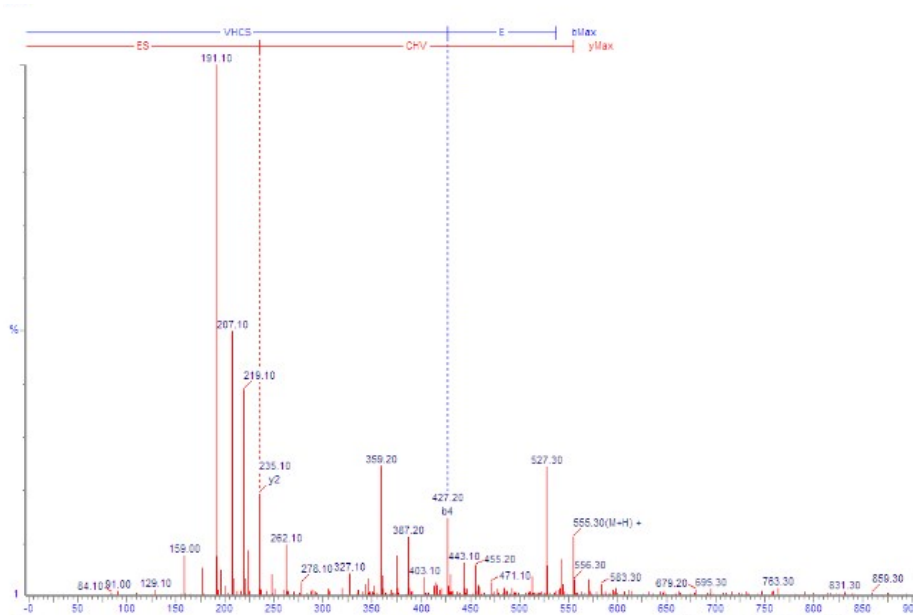

### APYF

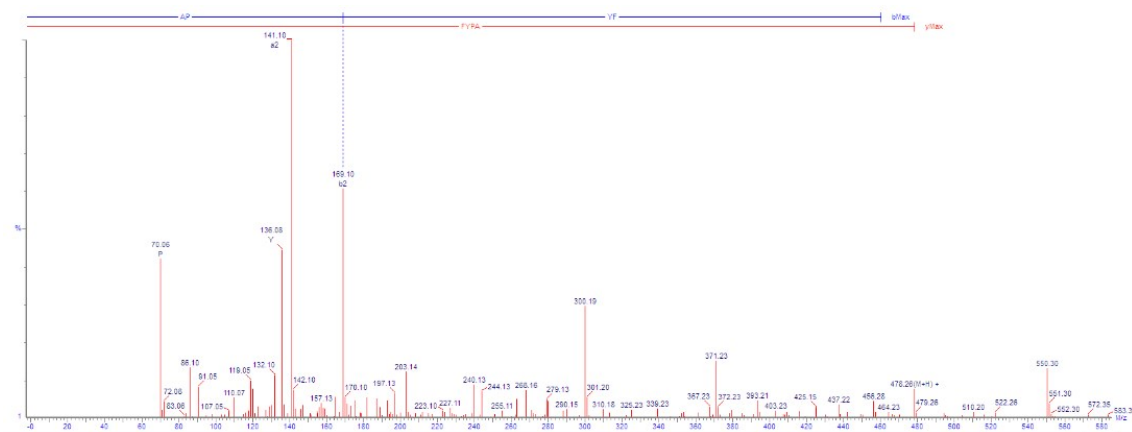

### AVTK

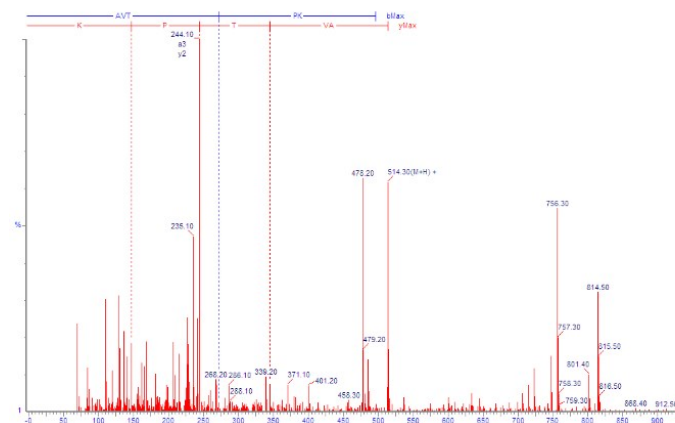

TIC chromatograms (most active fractions: DPP-IV and  $\alpha$ -glucosidase inhibitory)

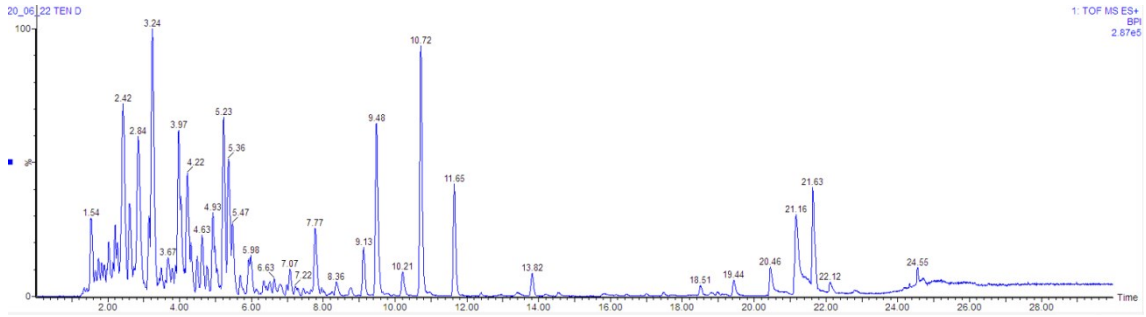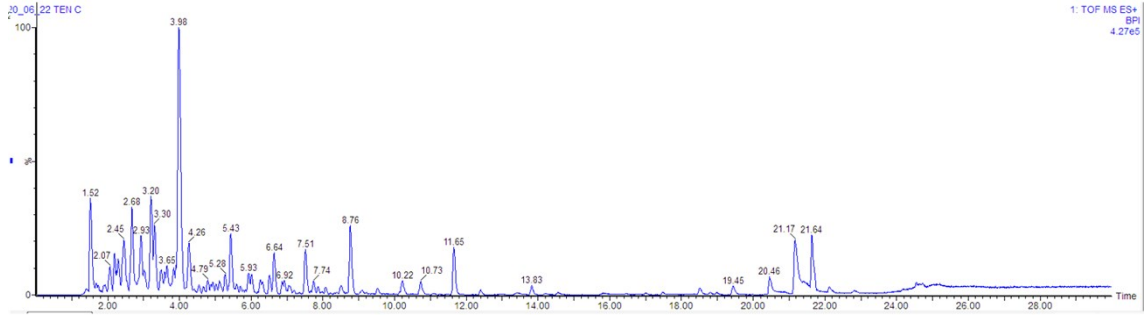

Supplement: d0fo02696d1.pdf [file d0fo02696d1.pdf]
